# Supplementary material for: Ethograms predict visual fear conditioning status in rats
Source: eLife journal article supplement (doi:10.7554/elife.102782), 2025-03-03
Supplement: supp [file elife-102782-supp-v1.zip]

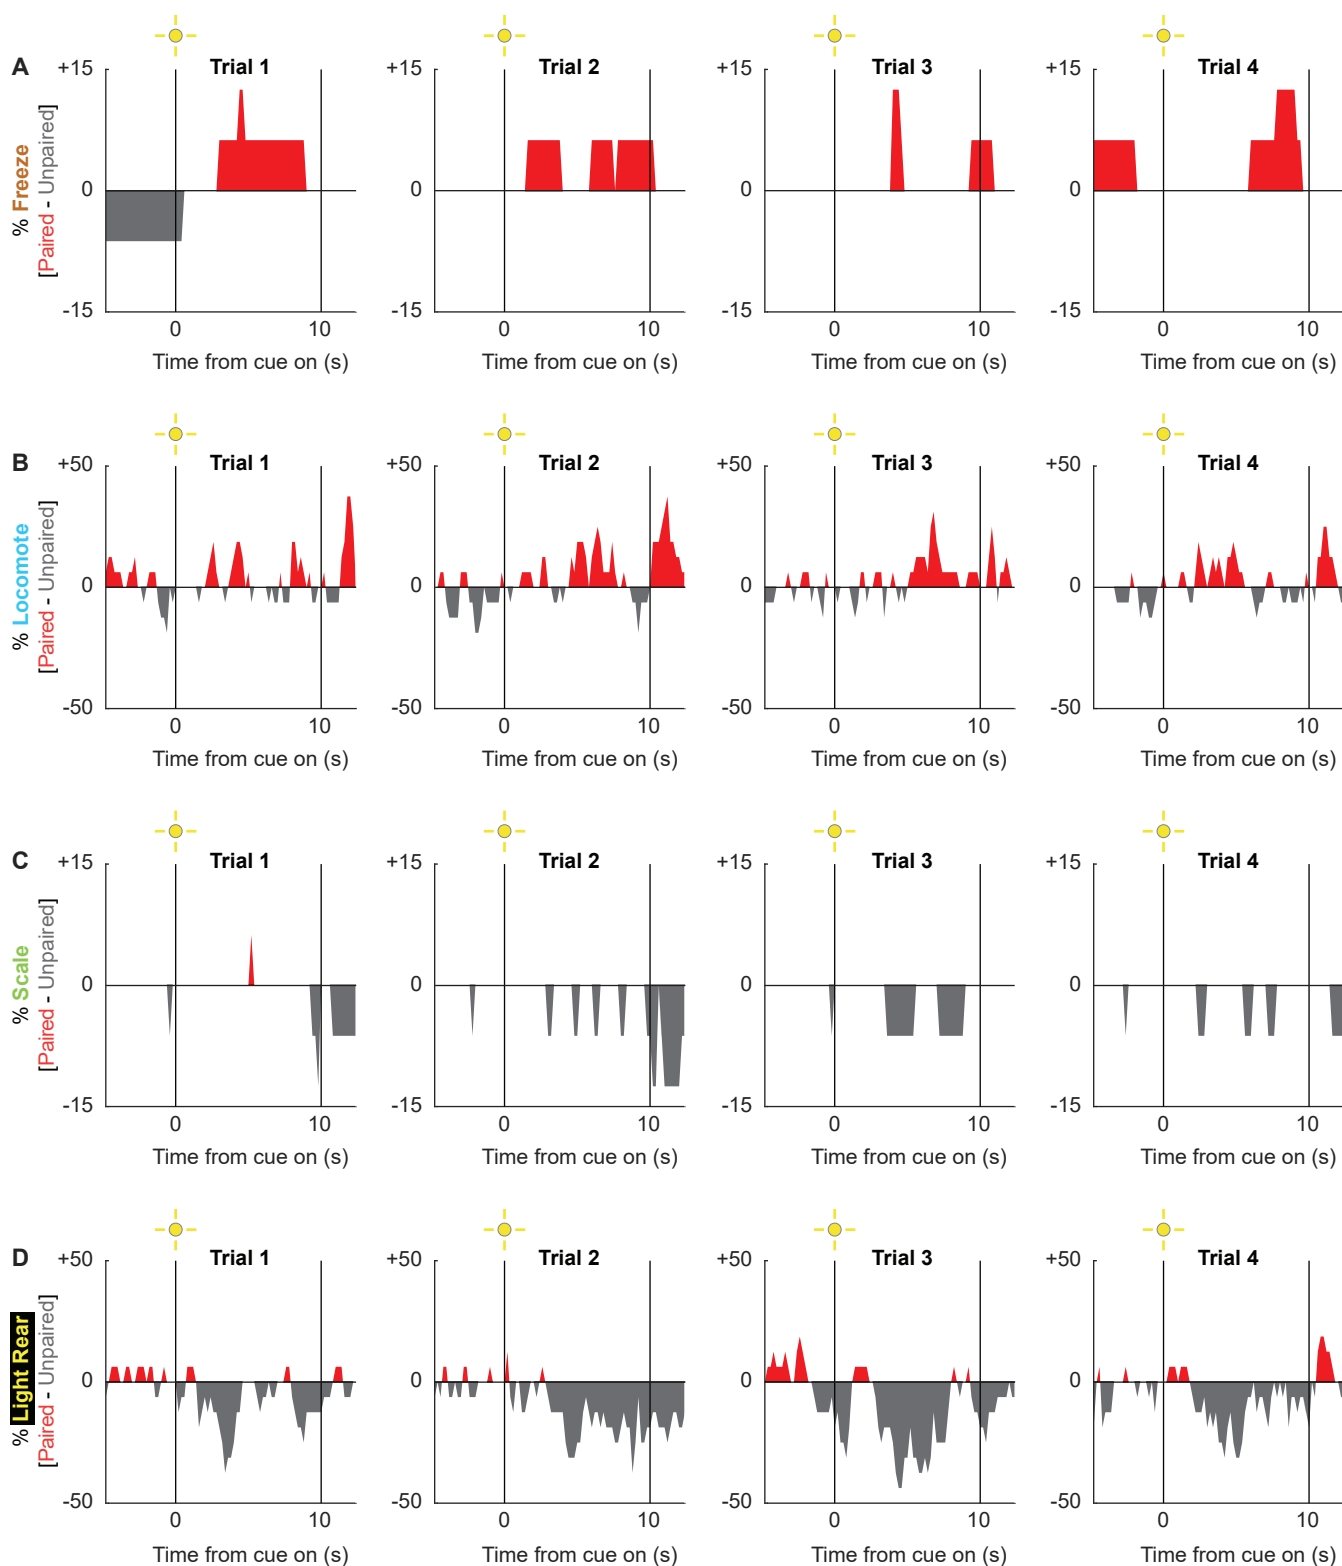

**Figure 4 - Supplemental Figure 3 | Trial by trial differential behavior.**

(A) % Differential freezing (Paired - Unpaired) is shown for all rats in 200-ms intervals from 5-s prior to cue onset to 2.5-s following cue offset. Areas above zero indicate times when Paired behavior exceeded Unpaired behavior (red). Areas below zero indicate times when Unpaired behavior exceeded Paired behavior (gray). Column 1 shows trial 1, column 2 trial 2, etc. Differential behavior for (B) locomotion, (C) scale, and (D) light rear are shown. Formatting as in A. Note the differences in scale for locomotion and light rear ( $\pm 50\%$ ) vs. freeze and scale ( $\pm 15\%$ ).
