# Supplementary material for: Ethograms predict visual fear conditioning status in rats
Source: eLife journal article supplement (doi:10.7554/elife.102782), 2025-03-03
Supplement: supp [file elife-102782-supp-v1.zip]

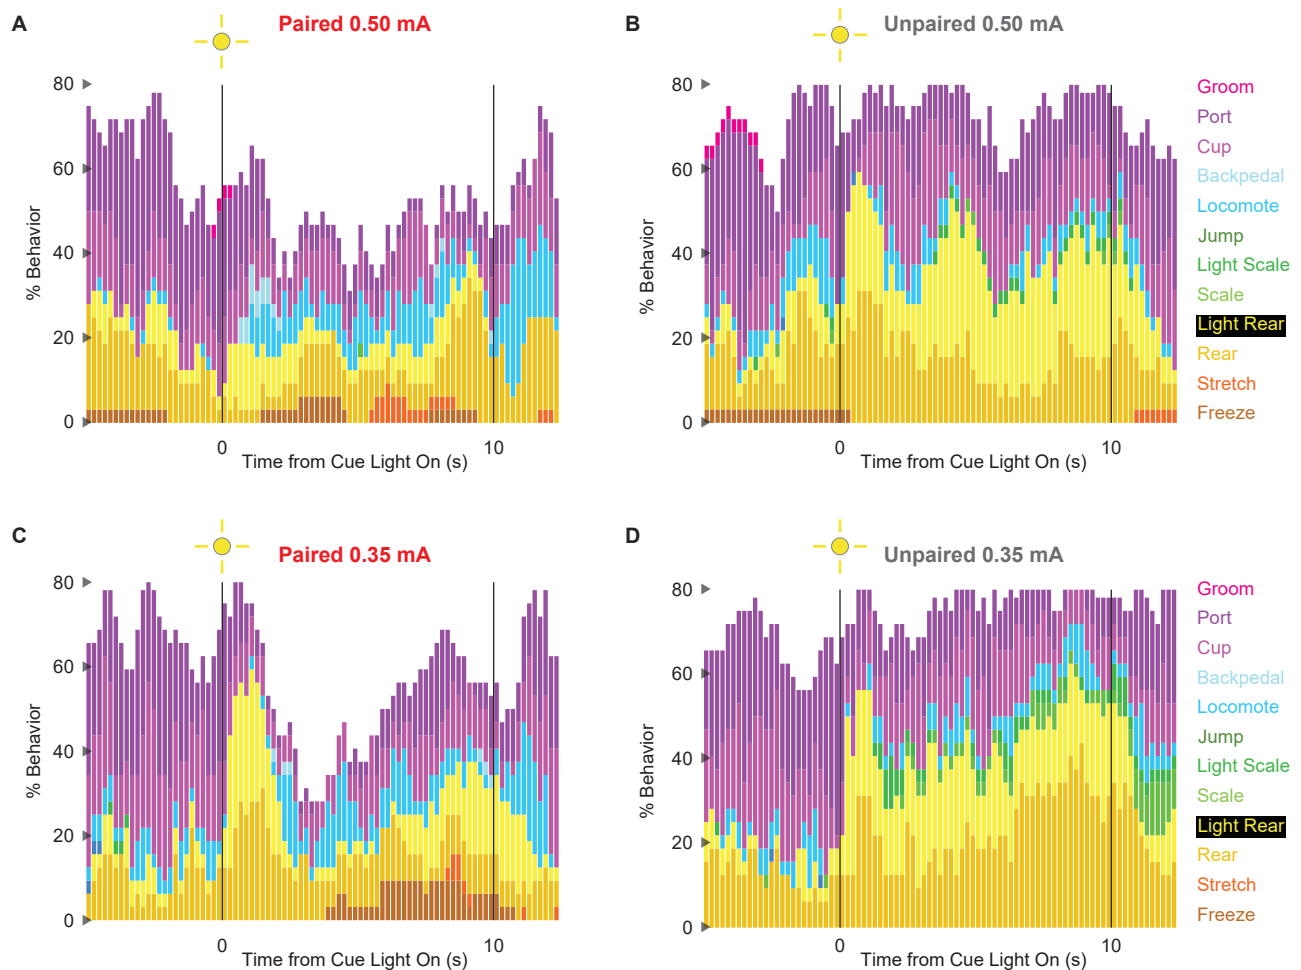

**Figure 4 - Supplemental Figure 2 | Extinction ethograms by intensity.**

(A) Ethogram for paired rats receiving the 0.50 mA foot shock shows % behavior (y axis) for each behavioral category in 200-ms intervals from 5-s prior to cue onset to 2.5-s following cue offset. Colors for each behavioral category: Freeze (light brown), Stretch (orange), Rear (mustard), Light Rear (yellow), Scale (light green), Light Scale (green), Jump (dark green), Locomote (cyan), Backpedal (sky blue), Cup (purple), Port (dark purple), and Groom (magenta). (B) Ethogram for unpaired rats receiving the 0.50 mA foot shock, details identical to paired rats. (C & D) Ethogram formatting is identical to A & B but for paired and unpaired rats receiving the 0.35 mA foot shock.
