# Supplementary material for: Ethograms predict visual fear conditioning status in rats
Source: eLife journal article supplement (doi:10.7554/elife.102782), 2025-03-03
Supplement: supp [file elife-102782-supp-v1.zip]

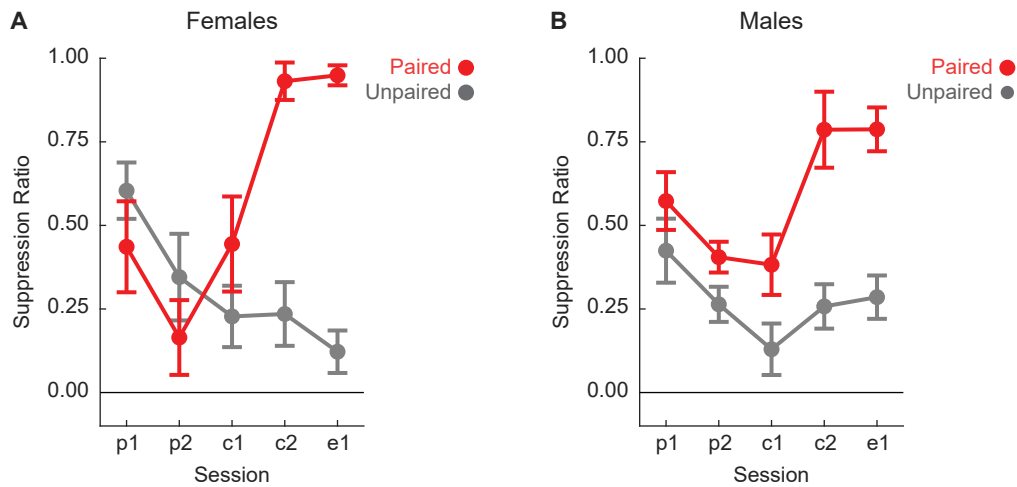

**Figure 1 - Supplemental Figure 1** | Conditioned suppression across sessions in female and male rats (Experiment 2).

(A) Mean  $\pm$  SEM suppression ratios for Paired (red) and Unpaired (gray) female rats from Experiment 2 are shown for the 2 pre-exposure sessions (p1 & p2), 2 conditioning sessions (c1 & c2), and 1 extinction session (e1). Vertical lines separate session types. (B) Mean  $\pm$  SEM suppression ratios are shown for male rats from Experiment 2 with identical formatting. The group  $\times$  sex  $\times$  session interactions results from female Paired and Unpaired rats crossing over from pre-exposure to conditioning, plus Paired and Unpaired females showing greater differential suppression ratios during extinction. Despite this, both female and male paired rats acquired conditioned suppression to the visual cue.
