# Supplementary material for: Ethograms predict visual fear conditioning status in rats
Source: eLife journal article supplement (doi:10.7554/elife.102782), 2025-03-03
Supplement: supp [file elife-102782-supp-v1.zip]

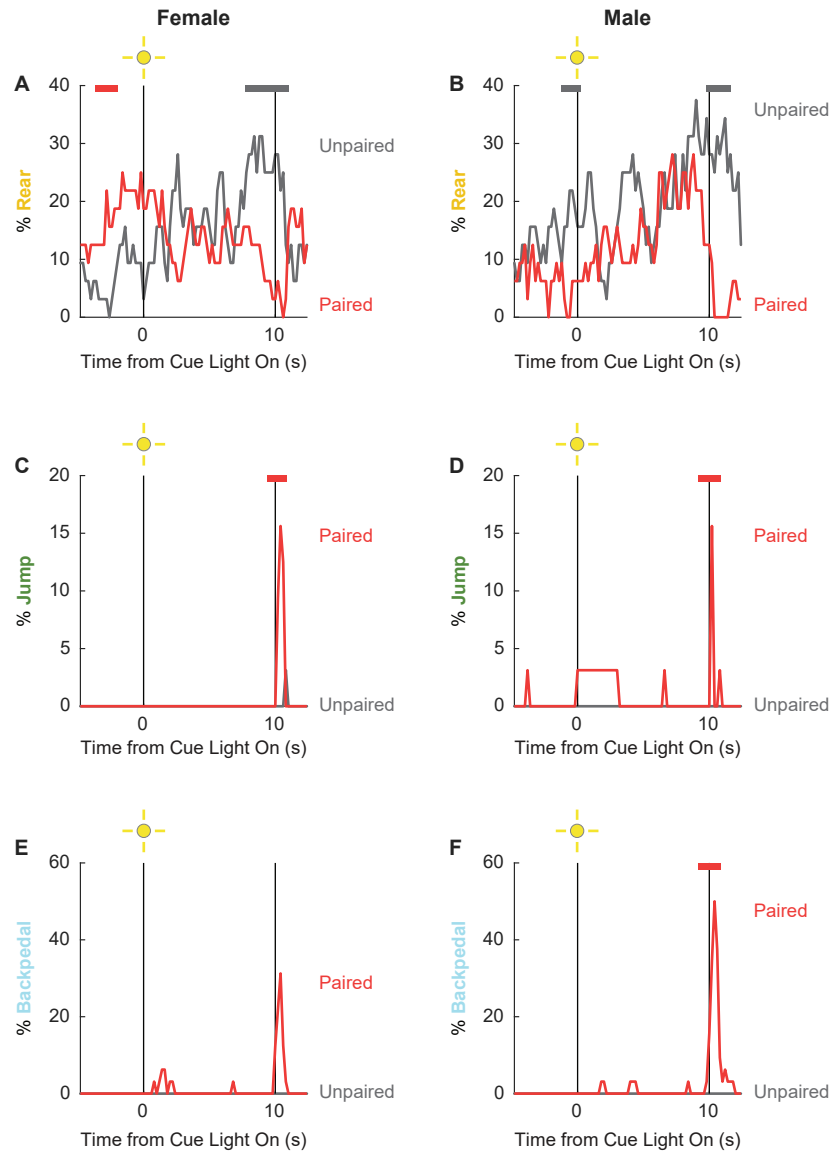

**Figure 3 - Supplemental Figure 3 |** Conditioning line graphs by sex.

Line graphs for the 3 behaviors showing a significant group x time x sex interaction are shown: Rear (**A & B**), Jump (**C & D**), and Backpedal (**E & F**). Females are plotted in the left column and males in the right column. % Behavior is plotted in 200-ms intervals from 5-s prior to cue onset to 2.5-s following cue offset. Paired rats (red) and unpaired rats (gray). Colored bars at the top of each axis indicate 1-s time periods in which paired and unpaired % behavior differed (independent samples t-test,  $p < 0.05$ ). Red bars indicate greater behavior in paired rats while gray bars indicate greater behavior in unpaired rats.
