# Supplementary material for: Ethograms predict visual fear conditioning status in rats
Source: eLife journal article supplement (doi:10.7554/elife.102782), 2025-03-03
Supplement: supp [file elife-102782-supp-v1.zip]

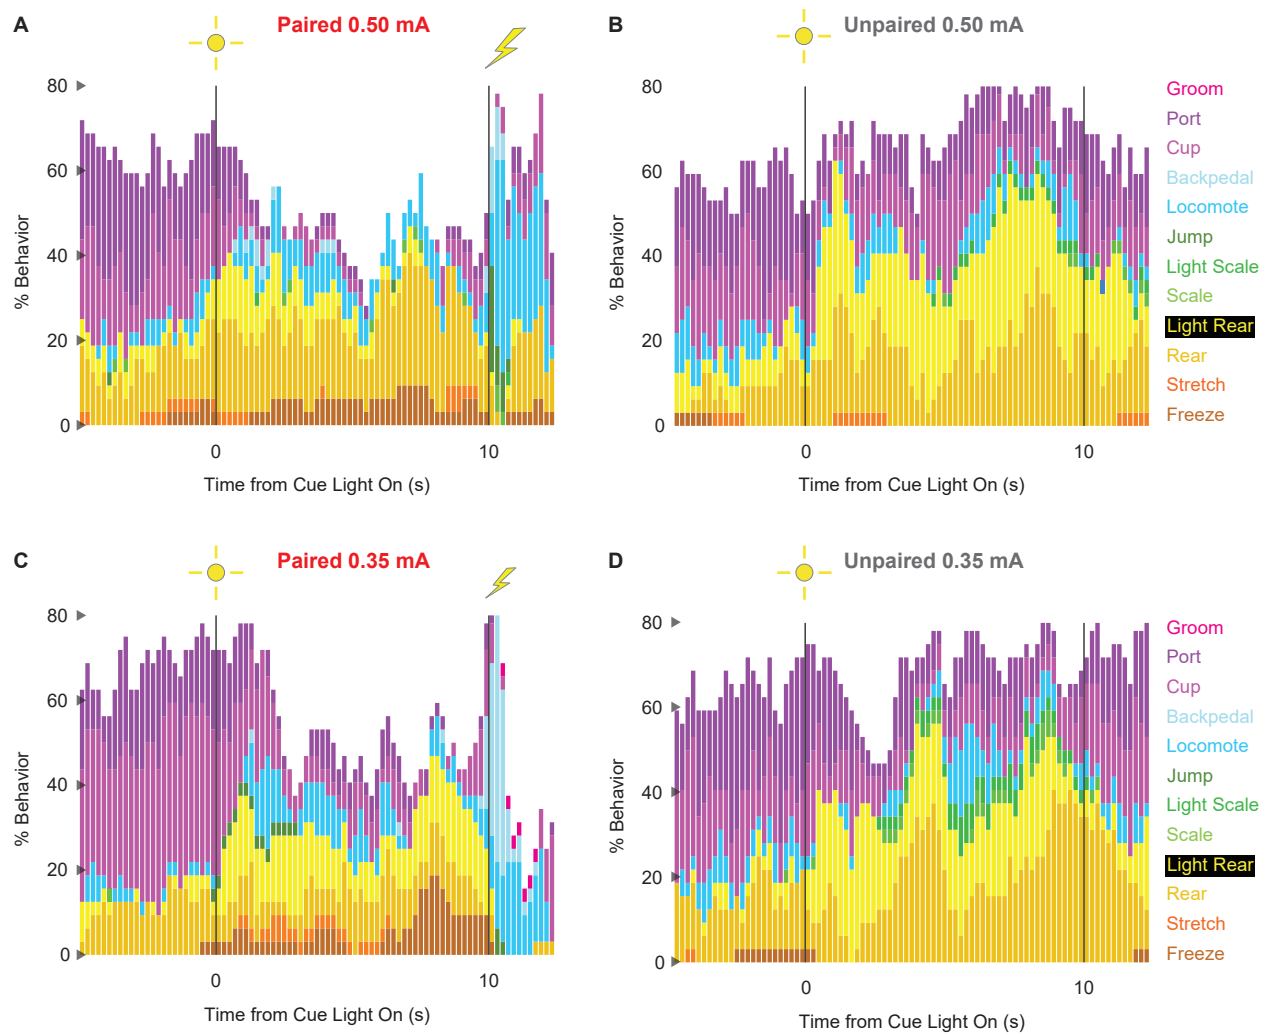

**Figure 3 - Supplemental Figure 2 |** Conditioning ethograms by intensity.

(A) Ethogram for paired rats receiving the 0.50 mA foot shock shows % behavior (y axis) for each behavioral category in 200-ms intervals from 5-s prior to cue light onset to 2.5-s following cue light offset. Paired rats had shock delivered at cue light offset. Colors for each behavior category: Freeze (light brown), Stretch (orange), Rear (mustard), Light Rear (yellow), Scale (light green), Light Scale (green), Jump (dark green), Locomote (cyan), Backpedal (sky blue), Cup (purple), Port (dark purple), and Groom (magenta). (B) Ethogram for unpaired rats receiving the 0.50 mA foot shock, details identical to paired rats. Unpaired rats did not receive shock at cue light offset. (C & D) Ethogram formatting is identical to A & B but for paired and unpaired rats receiving the 0.35 mA foot shock.
